# Supplementary material
Source: Springer Nature journal article supplement (https://www.springermedizin.de/resource/supplementary/12888_2006_207_MOESM5_ESM.pdf/9482192)

HSCL25

4,00  
3,50  
3,00  
2,50  
2,00  
1,50  
1,00

2,00

mastery

4,00

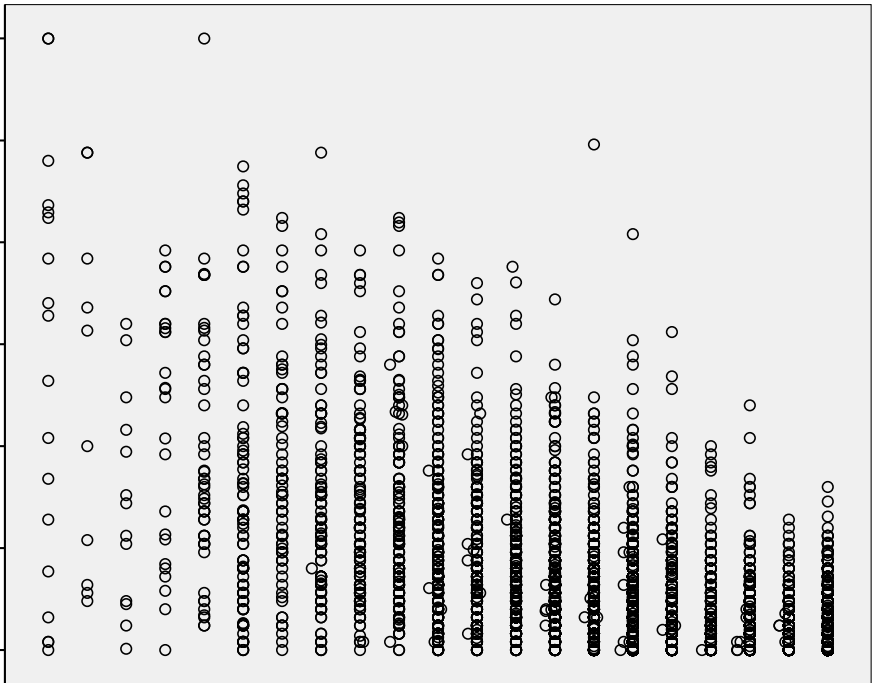

Supplement: MOESM5 [file 9482192]
